# Supplementary material for: Tetrasodium EDTA Is Effective at Eradicating Biofilms Formed by Clinically Relevant Microorganisms from Patients’ Central Venous Catheters
Source: PubMed Central journal article supplement (PMC6262258; doi:10.1128/msphere.00525-18), 2018-11-28
Supplement: sph006182705st2.pdf [file sph006182705st2.pdf]

**Table S2. Antibiotic susceptibility profiles for biofilm-forming microbes isolated from Ontario and Saskatchewan hospitals.**

| Microbial isolates <sup>A</sup>              | Antimicrobial Agents <sup>B</sup> |                        |            |            |            |            |           |         |            |            |            |         |           |          |            |           |           |           |
|----------------------------------------------|-----------------------------------|------------------------|------------|------------|------------|------------|-----------|---------|------------|------------|------------|---------|-----------|----------|------------|-----------|-----------|-----------|
|                                              | FOX                               | PEN                    | AMP        | OXA        | GEN        | STR        | CIP       | LVX     | MXF        | ERY        | CLI        | LZD     | VAN       | TET      | TGC        | NIT       | RIF       | SXT       |
| <b>Gram-positive bacteria</b>                |                                   |                        |            |            |            |            |           |         |            |            |            |         |           |          |            |           |           |           |
| <i>S. epidermidis</i> (ON)                   | POS                               | >=0.5 (R) <sup>C</sup> |            | >=4 (R)    |            |            | >=8 (R)   |         | >=8 (R)    | <=0.25 (S) | <=0.25 (S) | 2 (S)   | <=0.5 (S) | 2 (S)    | <=0.12 (S) | <=16 (S)  | <=0.5 (S) | 160 (R)   |
| <i>S. epidermidis</i> (SK)                   | NEG                               | <=0.03 (S)             |            | <=0.25 (S) |            |            | <=0.5 (S) |         | <=0.25 (S) | >=8 (R)    | <=0.25 (S) | 1 (S)   | <=0.5 (S) | <=1 (S)  | <=0.12 (S) | <=16 (S)  | <=0.5 (S) | <=10 (S)  |
| <i>S. aureus</i> (ON)                        | NEG                               | <=0.03 (S)             |            | <=0.25 (S) |            |            | <=0.5 (S) |         | <=0.25 (S) | <=0.25 (S) | <=0.25 (S) | 2 (S)   | <=0.5 (S) | <=1 (S)  | <=0.12 (S) | <=16 (S)  | <=0.5 (S) | <=10 (S)  |
| Methicillin-resistant <i>S. aureus</i> (ON)  | POS                               | >=0.5 (R)              |            | >=4 (R)    |            |            | >=8 (R)   |         | <=0.25 (S) | >=8 (R)    | >=8 (R)    | 2 (S)   | <=0.5 (S) | <=1 (S)  | <=0.12 (S) | <=16 (S)  | <=0.5 (S) | <=10 (S)  |
| Methicillin-resistant <i>S. aureus</i> (SK)  | POS                               | >=0.5 (R)              |            | >=4 (R)    |            |            | <=0.5 (S) |         | <=0.25 (S) | <=0.25 (S) | <=0.25 (S) | 2 (S)   | <=0.5 (S) | <=1 (S)  | <=0.12 (S) | <=16 (S)  | <=0.5 (S) | <=10 (S)  |
| <i>E. faecalis</i> (ON)                      |                                   | 1 (R)                  | <=2 (S)    | >=4 (R)    | SYN-S (S)  | SYN-S (S)  | <=0.5 (S) | 0.5 (S) |            | 1 (R)      | <=0.25 (S) | 2 (S)   | 1 (S)     | <=1 (S)  | <=0.12 (S) | <=16 (S)  |           |           |
| Vancomycin-resistant <i>E. faecalis</i> (SK) |                                   | >= 64 (R)              | >= 32 (R)  |            | SYN-S (S)  | SYN-S (S)  | >=8 (R)   | >=8 (R) |            | >=8 (R)    |            | 2 (S)   | >=32 (R)  | >=16 (R) | <=0.12 (S) | 128 (R)   |           |           |
| <b>Gram-negative bacteria</b>                |                                   |                        |            |            |            |            |           |         |            |            |            |         |           |          |            |           |           |           |
|                                              | AMP                               | AMC                    | TZP        | CFZ        | FOX        | CPD        | CTX       | CAZ     | CRO        | ETP        | MEM        | AMK     | GEN       | TOB      | CIP        | TGC       | NIT       | SXT       |
| <i>Escherichia coli</i> (ON)                 | 8 (S)                             | 4 (S)                  | <=4 (S)    | <=4 (S)    | <=4 (S)    | 0.5 (S)    | <=1 (S)   | <=1 (S) | <=1 (S)    | <=0.5 (S)  | <=0.25 (S) | <=2 (S) | <=1 (S)   | <=1 (S)  | <=0.25 (S) | <=0.5 (S) | <=16 (S)  | <=20 (S)  |
| <i>Escherichia coli</i> (SK)                 | <=2 (S)                           | <=2 (S)                | <=4 (S)    | <=4 (S)    | <=4 (S)    | <=0.25 (S) | <=1 (S)   | <=1 (S) | <=1 (S)    | <=0.5 (S)  | <=0.25 (S) | <=2 (S) | <=1 (S)   | <=1 (S)  | <=0.25 (S) | <=0.5 (S) | <=16 (S)  | <=20 (S)  |
| <i>Stenotrophomonas maltophilia</i> (ON)     |                                   |                        |            |            |            |            |           |         |            |            |            |         |           |          |            |           |           | <=20 (S)  |
| <i>Pseudomonas aeruginosa</i> (SK)           |                                   |                        | 8 (S)      |            |            |            | 32 (R)    | 4 (S)   |            |            | <=0.25 (S) | <=2 (S) | <=1 (S)   | <=1 (S)  | <=0.25 (S) | >=8 (R)   |           |           |
| <i>Enterobacter agglomerans</i> (ON)         |                                   |                        |            |            |            |            |           |         |            |            |            |         |           |          |            |           |           |           |
| <i>Serratia marcescens</i> (SK)              | 16 (R)                            | >=32 (R)               |            | >=64 (R)   | 16 (R)     |            | <=1 (S)   | <=1 (S) | <=1 (S)    | <=0.5 (S)  | <=0.25 (S) | <=2 (S) | <=1 (S)   | 8 (R)    | <=0.25 (S) | 1 (S)     | 256 (R)   | <=20 (S)  |
| <i>Proteus mirabilis</i> (ON)                | <=2 (S)                           | <=2 (S)                | <=4 (S)    | <=4 (S)    | <=4 (S)    |            | <=1 (S)   | <=1 (S) | <=1 (S)    | <=0.5 (S)  | <=0.25 (S) | <=2 (S) | <=1 (S)   | <=1 (S)  | <=0.25 (S) | 4 (R)     | 128 (R)   | >=320 (R) |
| <i>Klebsiella pneumoniae</i> (SK)            | >=32 (R)                          | 4 (S)                  | 16 (S)     | <=4 (S)    | >=64 (R)   | 2 (S)      | <=1 (S)   | <=1 (S) | <=1 (S)    | <=0.5 (S)  | <=0.25 (S) | <=2 (S) | <=1 (S)   | <=1 (S)  | >=4 (R)    | >=8 (R)   | 128 (R)   | >=320 (R) |
| <b>Control bacteria</b>                      |                                   |                        |            |            |            |            |           |         |            |            |            |         |           |          |            |           |           |           |
| <i>Salmonella</i> serovar Typhimurium        | <=2 (S)                           | <=2 (S)                | <=4 (S)    | <=4 (S)    | <=4 (S)    | <=0.25 (S) | <=1 (S)   | <=1 (S) | <=1 (S)    | <=0.5 (S)  | <=0.25 (S) | <=2 (S) | <=1 (S)   | <=1 (S)  |            | <=0.5 (S) | 32 (S)    | <=20 (S)  |
| <b>Fungi</b>                                 |                                   |                        |            |            |            |            |           |         |            |            |            |         |           |          |            |           |           |           |
|                                              | FLC                               | VRC                    | CAS        | MFG        | AMB        | 5FC        |           |         |            |            |            |         |           |          |            |           |           |           |
| <i>Candida albicans</i> (ON)                 | <=0.5 (S)                         | <=0.12 (S)             | <=0.12 (S) | <=0.06 (S) | 2 (R)      | <=1 (S)    |           |         |            |            |            |         |           |          |            |           |           |           |
| <i>Candida albicans</i> (SK)                 | <=0.5 (S)                         | <=0.12 (S)             | <=0.12 (S) | <=0.06 (S) | <=0.25 (S) | <=1 (S)    |           |         |            |            |            |         |           |          |            |           |           |           |
| <i>Candida glabrata</i> (ON)                 |                                   |                        | <=0.12 (S) | <=0.06 (S) | <=0.25 (S) | <=1 (S)    |           |         |            |            |            |         |           |          |            |           |           |           |
| <i>Candida glabrata</i> (SK)                 |                                   |                        | <=0.12 (S) | <=0.06 (S) | <=0.25 (S) | <=1 (S)    |           |         |            |            |            |         |           |          |            |           |           |           |

<sup>A</sup> Isolates were inoculated from freezer stocks and propagated on TSA-blood agar or Sabouraud-blood agar at 37°C, prior to analysis on the Vitek II system (Biomérieux). Gram-positive isolates were analyzed using the AST-GP67 card; Gram-negative isolates were analyzed using the AST-N219 card; Fungal isolates were analyzed using the AST-YS08 card.

<sup>B</sup> Abbreviations: FOX-cefoxitin; PEN-benzylpenicillin; AMP-ampicillin; OXA-oxacillin; GEN-gentamycin; STR-streptomycin; CIP-ciprofloxacin; LVX-levofloxacin; MXF-moxifloxacin; ERY-erythromycin; CLI-clindamycin; LZD-linezolid; VAN-vancomycin; TET-tetracycline; TGC-tigecycline; NIT-nitrofurantoin; RIF-rifampicin; SXT-trimethoprim/sulfamethoxazole; AMC-amoxicillin/clavulanic acid; TZP-piperacillin/tazobactam; CFZ-cefazolin; FOX-cefoxitin; CPD-cefpodoxime; CTX-cefotaxime; CAZ-cefotaxime; CAZ-ceftazidime; CRO-ceftriaxone; ETP-ertapenem; MEM-meropenem; AMK-amikacin; TOB-tobramycin; FLC-fluconazole; VRC-voconazole; CAS-caspofungin; MFG-micafungin; AMB-amphotericin B; 5FC-flucytosine

<sup>C</sup> MIC values are shown and isolates were designated as susceptible (S) or resistant (R) based on CLSI guidelines.
